# Supplementary material
Source: PubMed Central journal article supplement (PMC3032075)
Supplement: mmc1.pdf [file mmc1.pdf]

**AJHG, Volume 86**

**Supplemental Data**

**Principal-Component Analysis for  
Assessment of Population Stratification**

**in Mitochondrial Medical Genetics**

**Alessandro Biffi, Christopher D. Anderson, Michael A. Nalls, Rosanna Rahman, Akshata Sonni, Lynelle Cortellini, Natalia S. Rost, Mar Matarin, Dena G. Hernandez, Anna Plourde, Paul I.W. de Bakker, Owen A. Ross, Steven M. Greenberg, Karen L. Furie, James F. Meschia, Andrew B. Singleton, Richa Saxena, and Jonathan Rosand**

### Figure S1. mtGIF Distributions for Unadjusted Analyses of Case-Control and QTL Phenotypes

Distribution of observed mtGIF values under different simulation scenarios (as defined by correlation between simulated phenotypes and mitochondrial principal component 1) are shown for both case-control and QTL analyses.

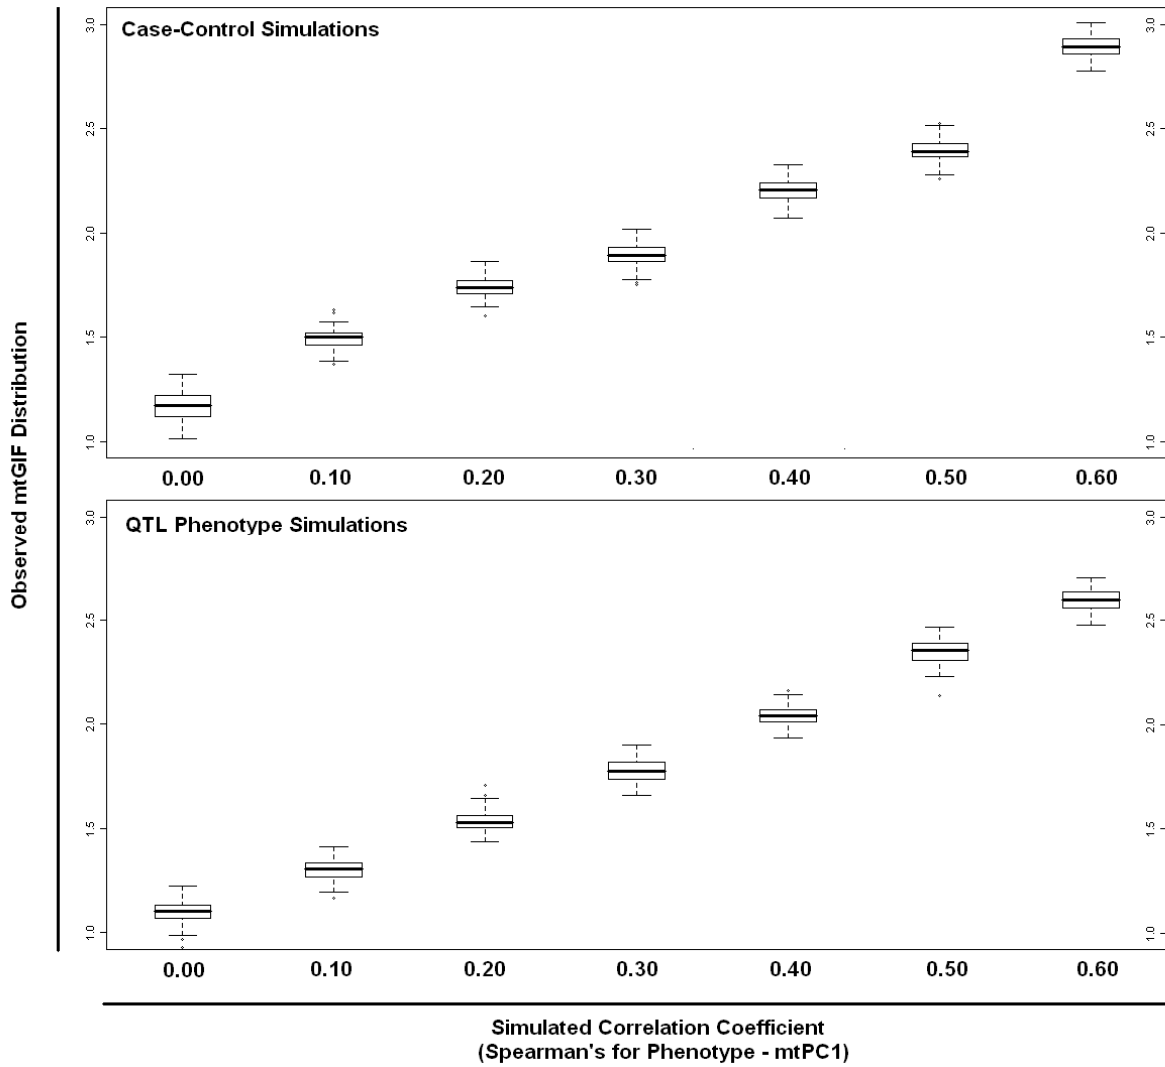

**Table S1. Mitochondrial SNPs Available for PCA Analysis on Samples Genotyped Using the Affymetrix 6.0 (MGH-AIS) Commercial Array**

| <b>SNP NAME</b> | <b>POSITION (BP)</b> | <b>ALLELE 1</b> | <b>ALLELE 2</b> |
|-----------------|----------------------|-----------------|-----------------|
| mt770           | 770                  | A               | G               |
| mt922           | 922                  | C               | T               |
| mt1019          | 1019                 | A               | G               |
| mt1049          | 1049                 | T               | C               |
| mt1439          | 1439                 | A               | G               |
| mt1599          | 1599                 | A               | G               |
| mt1701          | 1701                 | C               | T               |
| mt1812          | 1812                 | G               | A               |
| mt1889          | 1889                 | A               | G               |
| mt2333          | 2333                 | T               | C               |
| mt2353          | 2353                 | C               | T               |
| mt2417          | 2417                 | C               | T               |
| mt2707          | 2707                 | A               | G               |
| mt2759          | 2759                 | A               | G               |
| mt2790          | 2790                 | T               | C               |
| mt2858          | 2858                 | C               | T               |
| mt2886          | 2886                 | C               | T               |
| mt3011          | 3011                 | A               | G               |
| mt3197          | 3197                 | C               | T               |
| mt3450          | 3450                 | T               | C               |
| mt3666          | 3666                 | A               | G               |
| mt3918          | 3918                 | A               | G               |
| mt4580          | 4580                 | A               | G               |
| mt4655          | 4655                 | A               | G               |
| mt4769          | 4769                 | A               | G               |
| mt4977          | 4977                 | C               | T               |
| mt5285          | 5285                 | G               | A               |
| mt5393          | 5393                 | C               | T               |
| mt5460          | 5460                 | A               | G               |
| mt5581          | 5581                 | G               | A               |
| mt6185          | 6185                 | C               | T               |
| mt6455          | 6455                 | T               | C               |
| mt7028          | 7028                 | C               | T               |
| mt7175          | 7175                 | C               | T               |
| mt7196          | 7196                 | A               | C               |
| mt7624          | 7624                 | A               | T               |
| mt8206          | 8206                 | A               | G               |
| mt8428          | 8428                 | T               | C               |
| mt8468          | 8468                 | T               | C               |
| mt8584          | 8584                 | A               | G               |
| mt8655          | 8655                 | T               | C               |
| mt8975          | 8975                 | C               | T               |
| mt8994          | 8994                 | A               | G               |
| <b>SNP NAME</b> | <b>POSITION (BP)</b> | <b>ALLELE 1</b> | <b>ALLELE 2</b> |
| mt9042          | 9042                 | T               | C               |
| mt9055          | 9055                 | A               | G               |

|                 |                      |                 |                 |
|-----------------|----------------------|-----------------|-----------------|
| mt9123          | 9123                 | A               | G               |
| mt9347          | 9347                 | G               | A               |
| mt9449          | 9449                 | T               | C               |
| mt9698          | 9698                 | C               | T               |
| mt9818          | 9818                 | T               | C               |
| mt9950          | 9950                 | C               | T               |
| mt10086         | 10086                | G               | A               |
| mt10115         | 10115                | C               | T               |
| mt10238         | 10238                | C               | T               |
| mt10373         | 10373                | A               | G               |
| mt10463         | 10463                | C               | T               |
| mt10550         | 10550                | G               | A               |
| mt10589         | 10589                | A               | G               |
| mt10664         | 10664                | T               | C               |
| mt11176         | 11176                | A               | G               |
| mt11251         | 11251                | G               | A               |
| mt11299         | 11299                | C               | T               |
| mt11467         | 11467                | G               | A               |
| mt11641         | 11641                | G               | A               |
| mt11674         | 11674                | T               | C               |
| mt11719         | 11719                | G               | A               |
| mt11812         | 11812                | G               | A               |
| mt11914         | 11914                | A               | G               |
| mt12007         | 12007                | A               | G               |
| mt12236         | 12236                | A               | G               |
| mt12308         | 12308                | G               | A               |
| mt12361         | 12361                | G               | A               |
| mt12612         | 12612                | G               | A               |
| mt12693         | 12693                | G               | A               |
| mt12705         | 12705                | T               | C               |
| mt12720         | 12720                | G               | A               |
| mt13105         | 13105                | G               | A               |
| mt13276         | 13276                | G               | A               |
| mt13368         | 13368                | A               | G               |
| mt13506         | 13506                | T               | C               |
| mt13590         | 13590                | A               | G               |
| mt13617         | 13617                | C               | T               |
| mt13650         | 13650                | T               | C               |
| mt13708         | 13708                | A               | G               |
| mt14178         | 14178                | C               | T               |
| mt14284         | 14284                | T               | C               |
| mt14470         | 14470                | C               | T               |
| mt14905         | 14905                | A               | G               |
| mt15043         | 15043                | A               | G               |
| mt15136         | 15136                | T               | C               |
| mt15204         | 15204                | C               | T               |
| mt15218         | 15218                | G               | A               |
| mt15301         | 15301                | A               | G               |
| <b>SNP NAME</b> | <b>POSITION (BP)</b> | <b>ALLELE 1</b> | <b>ALLELE 2</b> |
| mt15326         | 15326                | A               | G               |
| mt15431         | 15431                | A               | G               |

|         |       |   |   |
|---------|-------|---|---|
| mt15452 | 15452 | A | C |
| mt15607 | 15607 | G | A |
| mt15629 | 15629 | C | T |
| mt15670 | 15670 | C | T |
| mt15784 | 15784 | C | T |
| mt15824 | 15824 | G | A |
| mt15924 | 15924 | G | A |
| mt16140 | 16140 | C | T |
| mt16148 | 16148 | T | C |

**Table S2. Mitochondrial SNPs Available for PCA Analysis on Samples Genotyped Using the Illumina 610 Quad (MGH-ICH and ISGS) Commercial Array**

| <b>SNP NAME</b> | <b>POSITION (BP)</b> | <b>ALLELE 1</b> | <b>ALLELE 2</b> |
|-----------------|----------------------|-----------------|-----------------|
| mt217           | 217                  | T               | C               |
| mt228           | 228                  | A               | G               |
| mt247           | 247                  | A               | G               |
| mt295           | 295                  | T               | C               |
| mt458           | 458                  | T               | C               |
| mt464           | 464                  | T               | C               |
| mt479           | 479                  | T               | C               |
| mt491           | 491                  | T               | C               |
| mt750           | 750                  | A               | G               |
| mt827           | 827                  | A               | G               |
| mt1048          | 1048                 | T               | C               |
| mt1189          | 1189                 | T               | C               |
| mt1438          | 1438                 | A               | G               |
| mt1719          | 1719                 | A               | G               |
| mt1736          | 1736                 | A               | G               |
| mt2160          | 2160                 | T               | C               |
| mt2485          | 2485                 | T               | C               |
| mt2706          | 2706                 | A               | G               |
| mt2789          | 2789                 | T               | C               |
| mt2885          | 2885                 | T               | C               |
| mt3010          | 3010                 | A               | G               |
| mt3197          | 3197                 | T               | C               |
| mt3348          | 3348                 | A               | G               |
| mt3394          | 3394                 | T               | C               |
| mt3480          | 3480                 | A               | G               |
| mt3594          | 3594                 | T               | C               |
| mt3666          | 3666                 | A               | G               |
| mt3721          | 3721                 | A               | G               |
| mt3915          | 3915                 | A               | G               |
| mt3918          | 3918                 | A               | G               |
| mt3971          | 3971                 | T               | C               |
| mt3993          | 3993                 | T               | C               |
| mt4025          | 4025                 | A               | G               |
| mt4336          | 4336                 | T               | C               |
| mt4769          | 4769                 | A               | G               |
| mt4820          | 4820                 | A               | G               |
| mt4824          | 4824                 | A               | G               |
| mt4883          | 4883                 | T               | C               |
| mt4917          | 4917                 | A               | G               |
| mt4977          | 4977                 | T               | C               |
| mt5004          | 5004                 | T               | C               |
| mt5046          | 5046                 | A               | G               |
| mt5264          | 5264                 | T               | C               |
| <b>SNP NAME</b> | <b>POSITION (BP)</b> | <b>ALLELE 1</b> | <b>ALLELE 2</b> |
| mt5391          | 5391                 | A               | G               |
| mt5442          | 5442                 | T               | C               |

|                 |                      |                 |                 |
|-----------------|----------------------|-----------------|-----------------|
| mt5460          | 5460                 | A               | G               |
| mt5495          | 5495                 | T               | C               |
| mt5773          | 5773                 | A               | G               |
| mt5951          | 5951                 | A               | G               |
| mt6027          | 6027                 | A               | G               |
| mt6046          | 6046                 | T               | C               |
| mt6153          | 6153                 | T               | C               |
| mt6221          | 6221                 | T               | C               |
| mt6260          | 6260                 | A               | G               |
| mt6681          | 6681                 | T               | C               |
| mt6735          | 6735                 | A               | G               |
| mt6753          | 6753                 | A               | G               |
| mt6776          | 6776                 | T               | C               |
| mt7055          | 7055                 | A               | G               |
| mt7175          | 7175                 | T               | C               |
| mt7274          | 7274                 | T               | C               |
| mt7769          | 7769                 | A               | G               |
| mt8269          | 8269                 | A               | G               |
| mt8278          | 8278                 | T               | C               |
| mt8617          | 8617                 | T               | G               |
| mt8655          | 8655                 | T               | C               |
| mt8869          | 8869                 | A               | G               |
| mt9072          | 9072                 | A               | G               |
| mt9094          | 9094                 | A               | G               |
| mt9378          | 9378                 | A               | G               |
| mt9540          | 9540                 | T               | C               |
| mt9667          | 9667                 | A               | G               |
| mt9698          | 9698                 | T               | C               |
| mt9716          | 9716                 | T               | C               |
| mt9899          | 9899                 | T               | C               |
| mt9950          | 9950                 | T               | C               |
| mt10034         | 10034                | T               | C               |
| mt10045         | 10045                | A               | G               |
| mt10238         | 10238                | T               | C               |
| mt10311         | 10311                | A               | G               |
| mt10321         | 10321                | T               | C               |
| mt10398         | 10398                | A               | G               |
| mt10463         | 10463                | T               | C               |
| mt10550         | 10550                | A               | G               |
| mt10586         | 10586                | A               | G               |
| mt10589         | 10589                | A               | G               |
| mt10688         | 10688                | A               | G               |
| mt10873         | 10873                | T               | C               |
| mt10915         | 10915                | T               | C               |
| mt11252         | 11252                | A               | G               |
| mt11377         | 11377                | A               | G               |
| mt11467         | 11467                | A               | G               |
| mt11485         | 11485                | T               | C               |
| <b>SNP NAME</b> | <b>POSITION (BP)</b> | <b>ALLELE 1</b> | <b>ALLELE 2</b> |
| mt11900         | 11900                | T               | C               |
| mt11914         | 11914                | A               | G               |

|         |       |   |   |
|---------|-------|---|---|
| mt12309 | 12309 | A | G |
| mt12372 | 12372 | A | G |
| mt12631 | 12631 | A | G |
| mt12670 | 12670 | T | C |
| mt12705 | 12705 | T | C |
| mt12851 | 12851 | A | G |
| mt13105 | 13105 | A | G |
| mt13263 | 13263 | A | G |
| mt13650 | 13650 | T | C |
| mt13780 | 13780 | A | G |
| mt13789 | 13789 | T | C |
| mt13965 | 13965 | T | C |
| mt14178 | 14178 | T | C |
| mt14233 | 14233 | A | G |
| mt14583 | 14583 | A | G |
| mt14798 | 14798 | T | C |
| mt15043 | 15043 | A | G |
| mt15244 | 15244 | A | G |
| mt15257 | 15257 | A | G |
| mt15302 | 15302 | A | G |
| mt15535 | 15535 | T | C |
| mt15670 | 15670 | T | C |
| mt15758 | 15758 | A | G |
| mt15784 | 15784 | T | C |
| mt15833 | 15833 | T | C |
| mt15904 | 15904 | T | C |
| mt15924 | 15924 | A | G |
| mt15928 | 15928 | A | G |
| mt15931 | 15931 | A | G |
| mt16130 | 16130 | A | G |
| mt16145 | 16145 | T | C |
| mt16146 | 16146 | A | G |
| mt16149 | 16149 | T | C |
| mt16163 | 16163 | A | G |
| mt16164 | 16164 | A | G |
| mt16184 | 16184 | A | C |
| mt16272 | 16272 | T | C |
| mt16329 | 16329 | T | C |
| mt16392 | 16392 | A | G |
| mt16393 | 16393 | A | G |
